# Supplementary material
Source: HighWire-hosted journal article supplement (https://bmjopen.bmj.com/content/15/3/e099414)
Supplement: inline-supplementary-material-2 [file inline-supplementary-material-2.pdf]

**WHO Trial Registration Data: Mobile Market Cluster Randomized Trial****Primary Registry and Trial Identifying Number**

Clinicaltrials.gov: NCT05672186

**Date of Registration in Primary Registry**

2022-12-20

**Secondary Identifying Numbers**

None

**Source(s) of Monetary or Material Support**

Research reported in this publication was supported by the National Institute of Nursing Research of the National Institutes of Health under award number R01NR020539 (PI: Horning). This study used REDCap to for data collection which was supported by Clinical and Translations Science Institute grant (UL1TR002494) from the National Institutes of Health's National Center for Advancing Translations Sciences. The content is solely the responsibility of the authors and does not necessarily represent the official views of the National Institutes of Health.

**Primary Sponsor**

Melissa Horning, PI of the trial

**Secondary Sponsor(s)**

None.

**Contact for Public Queries**

Melissa Horning, [horn0199@umn.edu](mailto:horn0199@umn.edu); 612-624-1947; 5-140 Weaver Densford Hall 308  
Harvard St SE, Minneapolis, MN 55414

**Contact for Scientific Queries**

Melissa Horning, PhD, RN, PHN  
Principal Investigator of the trial & Associate Professor  
University of Minnesota School of Nursing  
5-140 Weaver Densford Hall  
308 Harvard St SE, Minneapolis, MN 55414  
[horn0199@umn.edu](mailto:horn0199@umn.edu); 612-624-1947

**Public Title**

Mobile Food Market Cluster Randomized Trial

**Scientific Title**

Evaluating Diet, Food Insecurity, and Food Purchasing Outcomes of a Full-Service Mobile Food Market with a Cluster Randomized Trial

**Countries of Recruitment**

United States of America

**Health Condition(s) or Problem(s) Studied**

Dietary quality, Food insecurity, Level of food insecurity, average weekly servings of fruits and vegetables procured, fruit and vegetable intake (servings per day) daily intake of energy (kcal per day), percent of calories from added sugar, sodium intake (mg/day)

## WHO Trial Registration Data: Mobile Market Cluster Randomized Trial

### Intervention(s)

Twin Cities Mobile Market: Full-service mobile market implementation: the market will visit intervention sites weekly. The market will carry items from all food groups including fresh, frozen and canned fruits and vegetables, whole grains, dairy/ dairy substitutes, proteins (e.g., frozen meat/fish, beans, eggs), and dry goods (e.g., cooking oil, spices). Prices on the market are affordable, approximately 10% lower than grocery stores.

Waitlist Control Description: Participants at waitlist control sites receive the full-service mobile market intervention after final follow-up data collection is complete.

### Key Inclusion and Exclusion Criteria

Participants must meet the following criteria:

- being aged 18 years or older;
- identifying as the primary food shopper in their household;
- being able to speak English or ASL;
- living within a half mile of the community site location; and
- reporting to be likely or somewhat likely to shop at the market in response to: "how likely would you be to shop regularly at the Twin Cities Mobile Market if it came to your neighborhood each week (response options: likely to unlikely).
- willing and able to participate in all study data collection activities

Exclusion Criteria:

- planning to move in the next 12 months
- currently shopping at the mobile market
- not having a phone number or mailing address
- presence of a condition or abnormality that would prohibit participation in the study or the quality of the data

### Study Type

Cluster randomized trial

### Date of First Enrollment

2023-01-12

### Sample Size

262 (target was 264)

### Recruitment Status

Completed 11/2025

### Primary Outcome(s)

Dietary quality measured with dietary recall interviews

### Key Secondary Outcomes

Food insecurity, Level of food insecurity, average weekly servings of fruits and vegetables procured, fruit and vegetable intake (servings per day) daily intake of energy (kcal per day), percent of calories from added sugar, sodium intake (mg/day)

**WHO Trial Registration Data: Mobile Market Cluster Randomized Trial****Ethics Review**

University of Minnesota

Last approval date was 2025-08-21
